# Supplementary material for: Compositions and mixing states of aerosol particles by aircraft observations in the Arctic springtime, 2018
Source: Copernicus journal article supplement (doi:10.5194/acp-21-3607-2021), 2021-03-09
Supplement: Supplementary file 1 [file acp-21-3607-2021-supplement.pdf]

Supplement of Atmos. Chem. Phys., 21, 3607–3626, 2021  
<https://doi.org/10.5194/acp-21-3607-2021-supplement>  
© Author(s) 2021. This work is distributed under  
the Creative Commons Attribution 4.0 License.

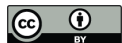

*Supplement of*

## **Compositions and mixing states of aerosol particles by aircraft observations in the Arctic springtime, 2018**

**Kouji Adachi et al.**

*Correspondence to:* Kouji Adachi (adachik@mri-jma.go.jp)

The copyright of individual parts of the supplement might differ from the CC BY 4.0 License.

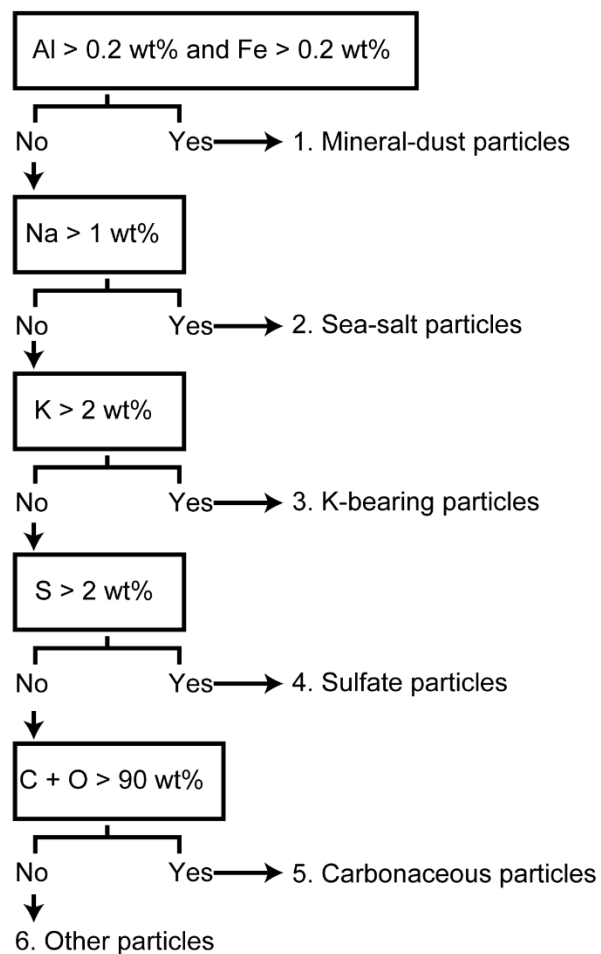

**Figure S1.** Flow chart to classify the individual particles into six categories based on the STEM-EDS measurements. This flow chart is nearly the same as that in Adachi et al. (2020), but we excluded primary biological aerosol particles (P-bearing particles) in the current study because of the lack of these particles.

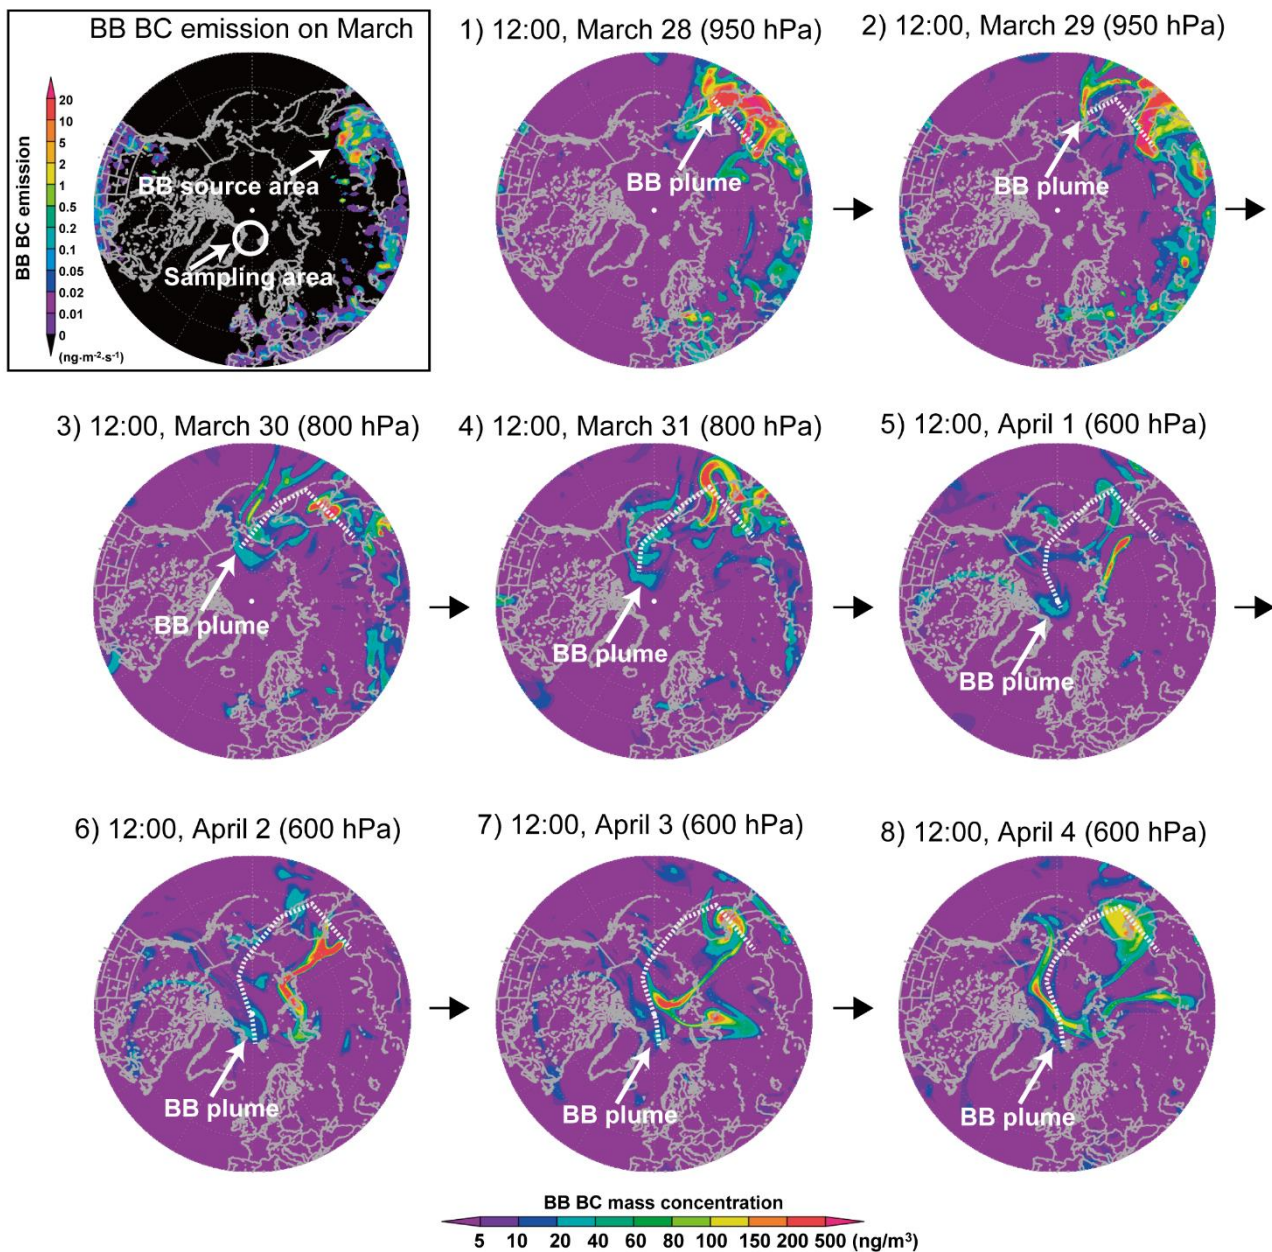

**Figure S2.** Black carbon (BC) emissions from biomass burning (BB) in March 2018 (upper left) and horizontal distributions of the mass concentration of BC originating from BB from 28 March to 4 April 2018 at 12:00 UTC (1-8). The dotted lines indicate the transport pathway of the BB BC plume that reached the sampling area between 2 and 4 April. Note that the pressure (altitude) levels are different in each panel depending on the air mass transport.

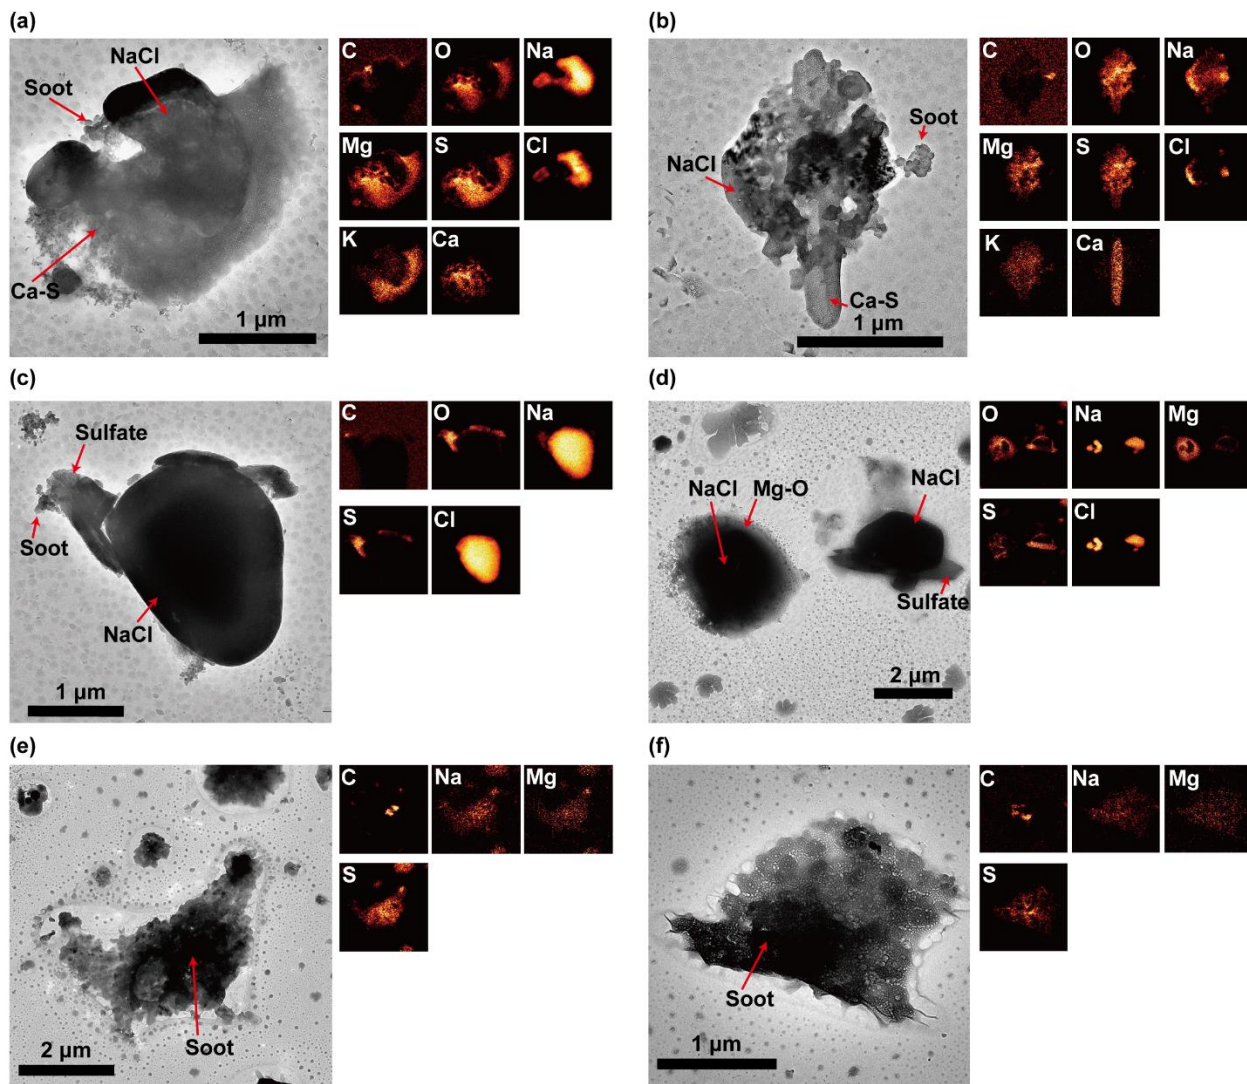

30 **Figure S3.** TEM and elemental mapping images of the sea-salt particles. The particles in (a), (b), (c),  
 and (d) were collected from 10:00-10:19, 30 March, 2018, and those in (e) and (f) were collected from  
 14:40-14:59, 31 March. The left TEM image in each panel shows the sea-salt particles mixed with  
 various grains. Elemental mapping images of the TEM areas for the detected elements are shown on the  
 right in each panel. Chlorine was not detected in the particles in (e) and (f) because of Cl replacement  
 35 with sulfate in the atmosphere.

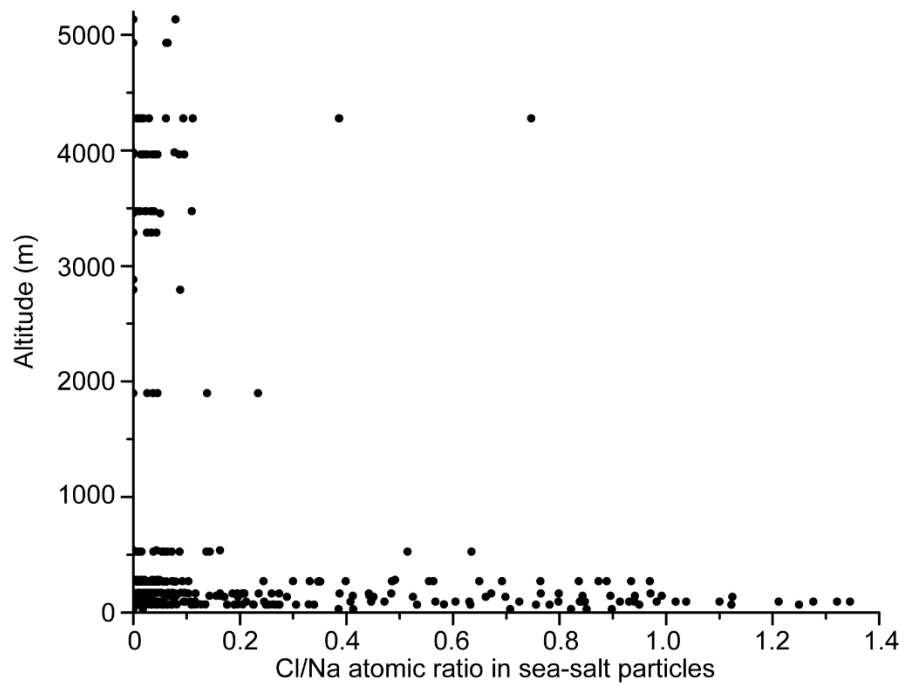

**Figure S4.** Ratios of Cl to Na in the atomic ratio for all individual sea-salt particles. Chlorine was largely lost in the particles collected above 1000 m.

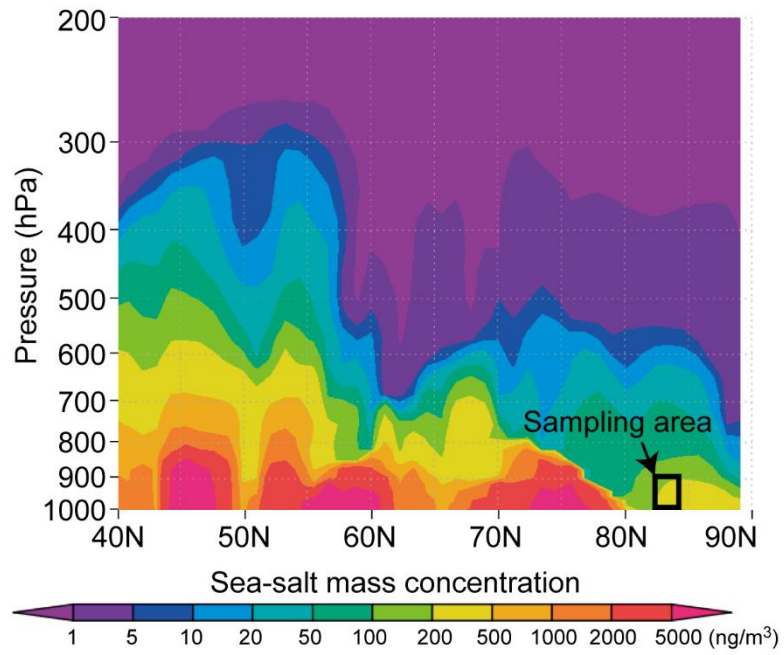

40 **Figure S5.** Example model result of the vertical distribution of the sea-salt mass concentration on 12:00 UTC, 30 March 2018 at 0° E longitude. The sea-salt number fractions in the TEM analysis were relatively high on that day. The sampling area is shown in a black square.

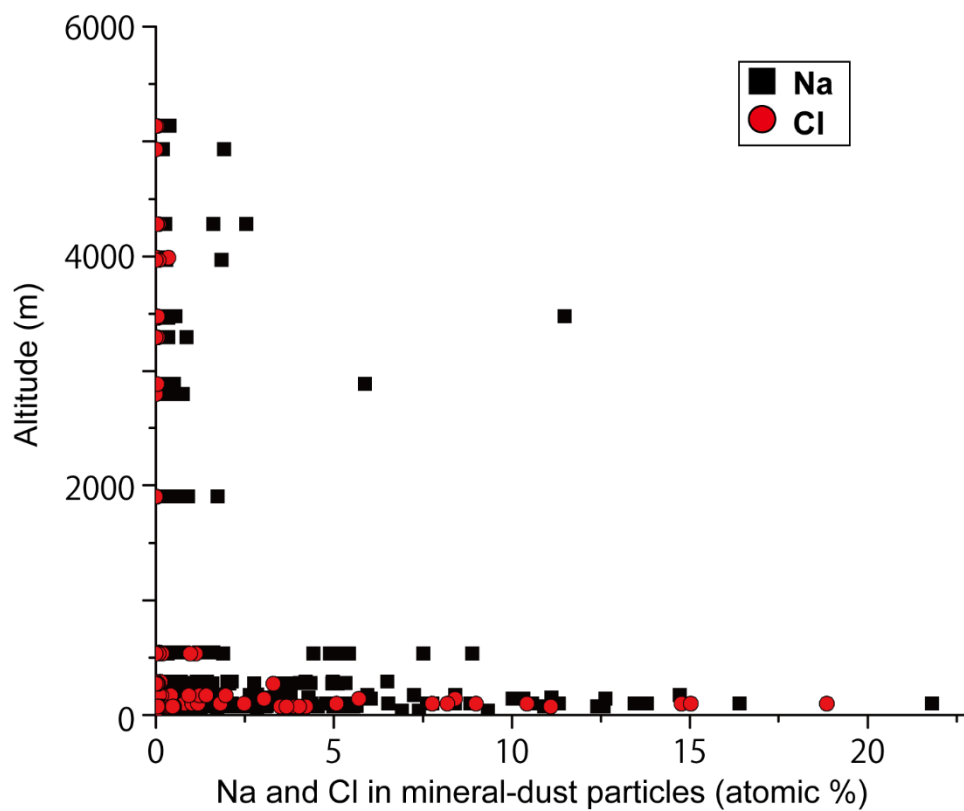

45 **Figure S6.** Atomic percent of Na (black) and Cl (red) within all mineral-dust particles along with their sampling altitude. The sea-salt fractions within the individual mineral-dust particles are high at a low altitude.



(a) Horizontal dust distribution at 950 hPa

(b) Vertical dust distribution at 10° E longitude

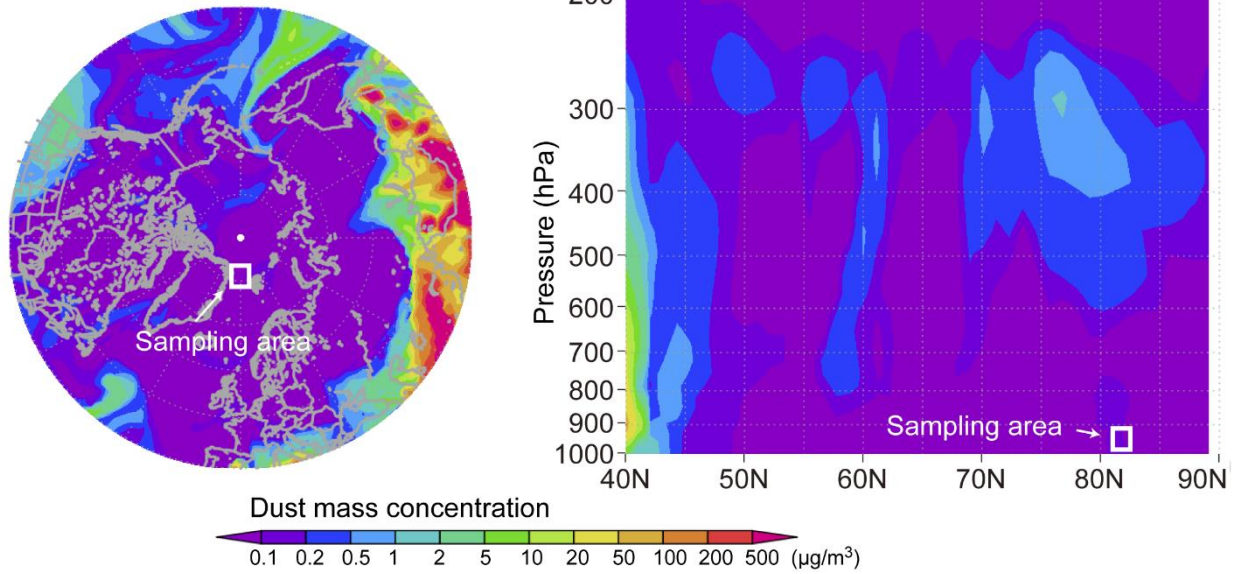

50 **Figure S7.** Example model results of the (a) horizontal and (b) vertical distributions of the mineral-dust mass concentration on 12:00 UTC, 30 March 2018. The mineral-dust number fractions in the TEM analysis were relatively high on that day, but no dust plume was detected in the model. The vertical distribution is shown along the 10° E longitude. The sampling area is shown in the white squares.



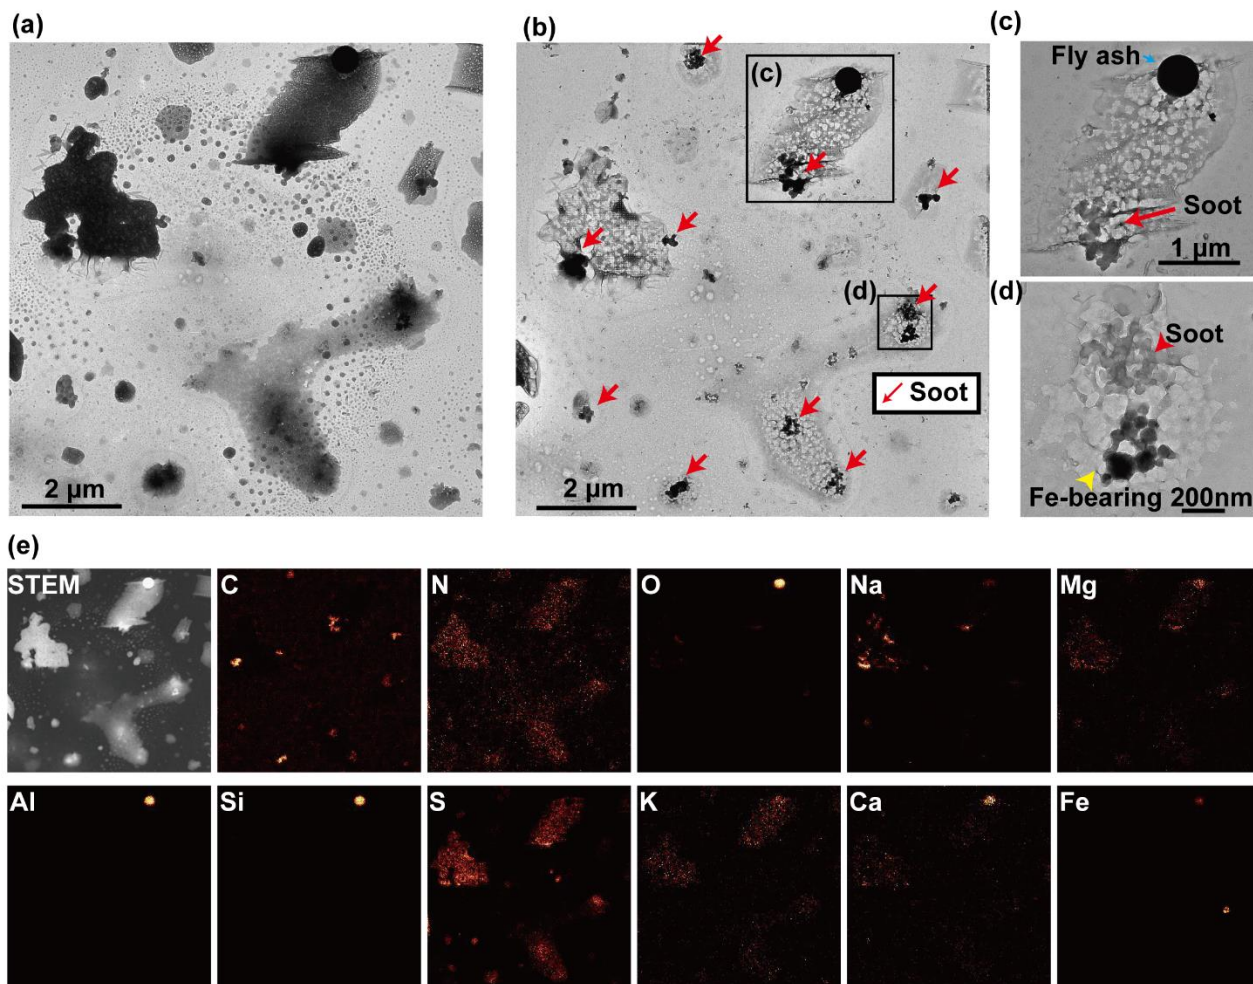

55

**Figure S8.** TEM and elemental mapping images of the sulfate particles containing inclusions. (a) TEM image before the mapping analysis and (b) after the mapping analysis. Electron-beam exposure removed sulfate, and the inclusions became more apparent. (c) A particle in the image (b) with fly-ash and soot inclusions. (d) A particle with Fe-aggregate and soot inclusions. (e) Elemental mapping images of the TEM areas of the detected elements. The C distributions in the mapping image correspond to the soot particles. The fly-ash particle in (c) includes O, Al, and Si as its main components. Fe is apparent in the Fe-aggregate particle in (d). The sample was collected from 14:40-14:59, 31 March 2018.

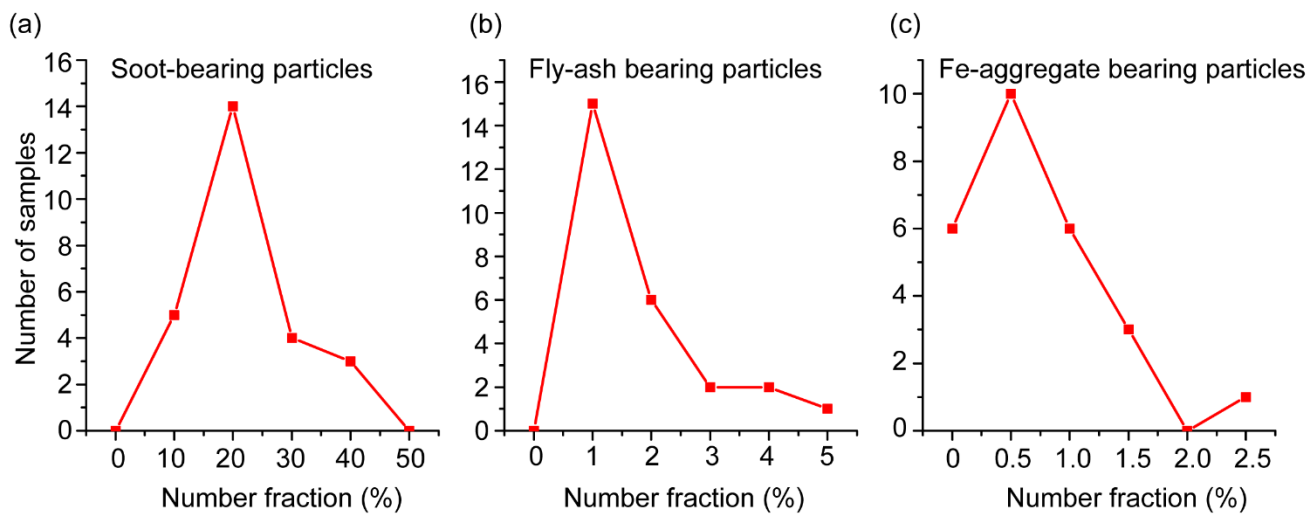

65 **Figure S9.** Histogram of the number fractions of the particles containing inclusions. (a) Soot-bearing particle number fractions. (b) Fly-ash bearing particle number fractions. (c) Fe-aggregate-bearing particle number fractions. The average values of these number fractions are 17%, 1.4%, and 0.5%, respectively.

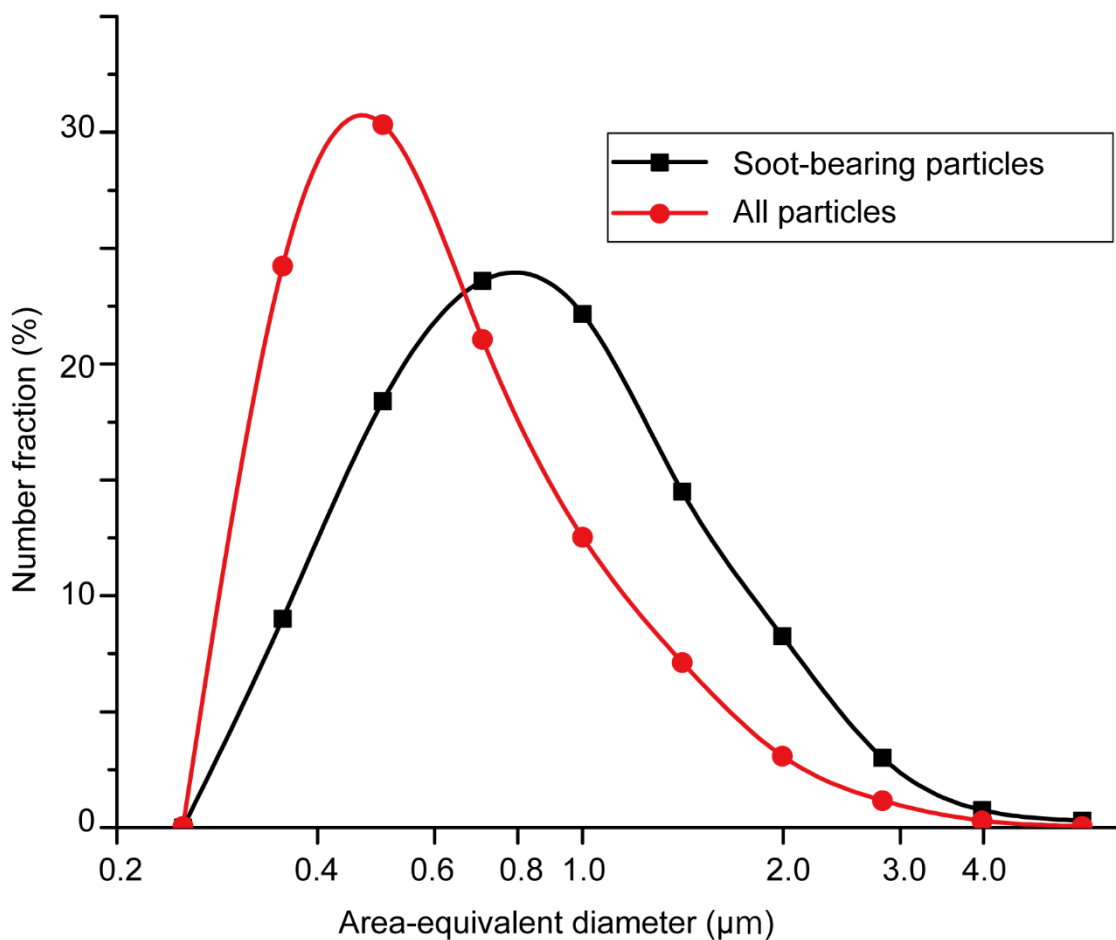

70

**Figure S10.** Size distributions of the soot-bearing particles (black line) and all particles (red line). The size bins are shown on a log scale ( $< 0.25$ ,  $0.25-0.35$ ,  $0.35-0.5$ ,  $0.5-0.71$ ,  $0.71-1.00$ ,  $1.00-1.41$ ,  $1.41-2.00$ ,  $2.00-2.82$ ,  $2.82-3.98$ , and  $>3.98$   $\mu\text{m}$ ). The sizes of the soot-bearing particles reflect those of their host particles. The numbers of all particles and soot-bearing particles are 7844 and 1331, respectively.

75

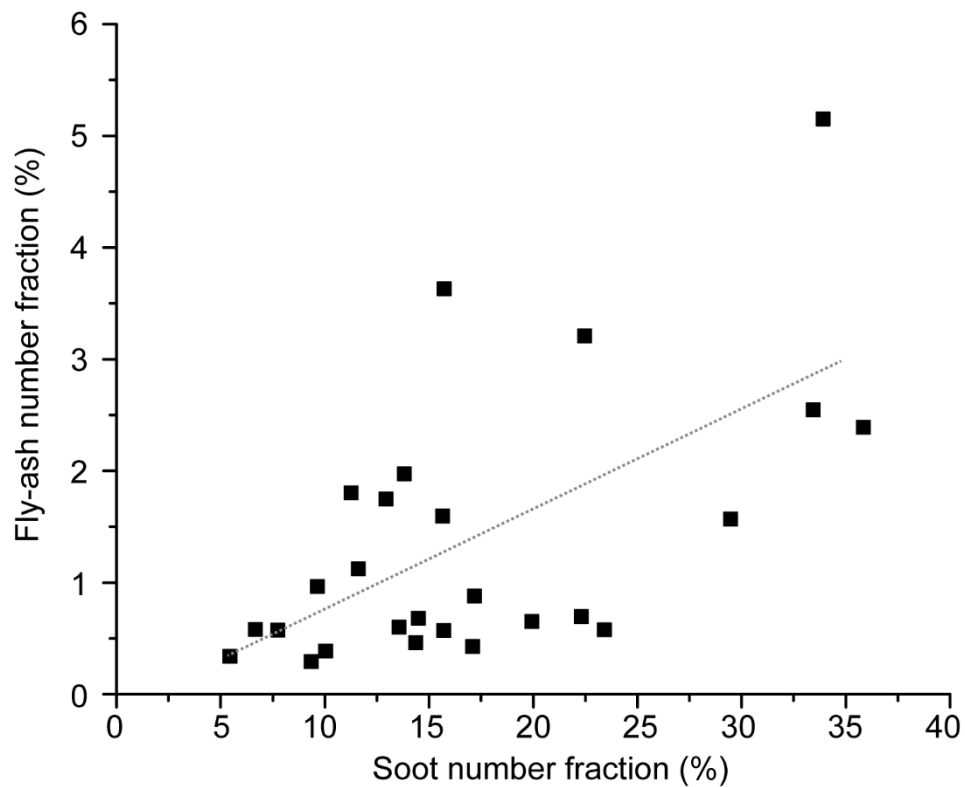

**Figure S11.** The relation between the number fractions of the soot and fly-ash particles within each TEM sample.  $R^2=0.35$ .

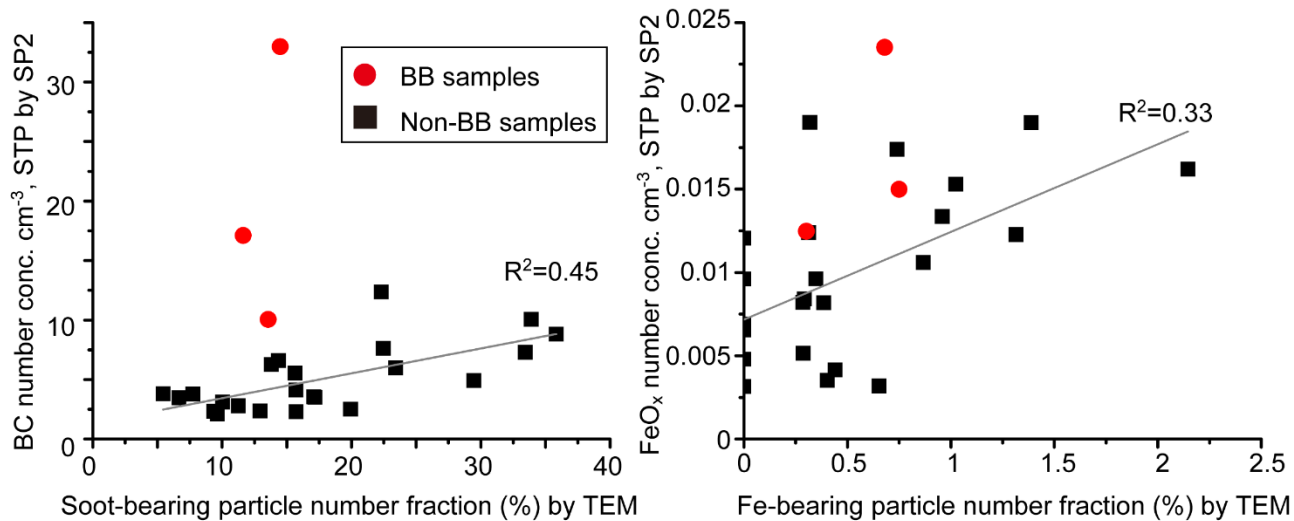

80

**Figure S12.** Relations between TEM and SP2 measurement for Soot/BC and Fe-bearing particles/FeO<sub>x</sub>. Left: Soot-bearing particle number fraction by TEM vs. BC number concentrations by SP2. Right: Fe-bearing particle number fraction vs. FeO<sub>x</sub> number concentration by SP2. Red plots indicate BB samples. The correlations were calculated for non-BB samples.

85

**SI Table 1.** Sampling date and time, number fractions of the main components and inclusions, and sampling point information. Inclusion % values are relative to total measured particles.

| Sampling      |                  | Main components (Number fractions %) |          |           |         |              |       | Inclusions (%) |         |            | Sampling points |          |           |                       |
|---------------|------------------|--------------------------------------|----------|-----------|---------|--------------|-------|----------------|---------|------------|-----------------|----------|-----------|-----------------------|
| Sampling date | Start time (UTC) | Mineral dust                         | Sea salt | K-bearing | Sulfate | Carbonaceous | Other | Soot           | Fly ash | Fe-bearing | Altitude (m)    | Latitude | Longitude | Biomass burning plume |
| 25-Mar        | 14:00            | 8                                    | 23       | 3         | 65      | 0            | 1     | 22             | 0.7     | 0.3        | 34              | 81.59619 | -16.6591  |                       |
| 25-Mar        | 15:40            | 9                                    | 9        | 4         | 75      | 0            | 3     | 14             | 2.0     | 1.3        | 541             | 81.50161 | -9.51961  |                       |
| 25-Mar        | 16:40            | 5                                    | 3        | 5         | 86      | 1            | 1     | 23             | 0.6     | 0.9        | 2797            | 81.50279 | -8.5448   |                       |
| 26-Mar        | 12:40            | 5                                    | 21       | 1         | 66      | 5            | 1     | 16             | 0.6     | 0.3        | 275             | 82.56004 | -14.1693  |                       |
| 26-Mar        | 13:00            | 2                                    | 14       | 0         | 71      | 9            | 3     | 10             | 0.4     | 0.4        | 147             | 82.50293 | -12.742   |                       |
| 26-Mar        | 15:00            | 1                                    | 6        | 6         | 70      | 12           | 5     | 14             | 0.5     | 1.4        | 5133            | 82.49932 | -14.4512  |                       |
| 27-Mar        | 14:20            | 4                                    | 14       | 3         | 62      | 12           | 5     | 17             | 0.9     | 0.4        | 271             | 82.46931 | -18.3625  |                       |
| 27-Mar        | 14:40            | 6                                    | 12       | 4         | 50      | 29           | 0     | 11             | 1.8     | 0.0        | 137             | 82.50295 | -16.564   |                       |
| 27-Mar        | 15:40            | 3                                    | 9        | 6         | 41      | 28           | 13    | 17             | 0.4     | 0.0        | 1901            | 82.50208 | -16.6887  |                       |
| 30-Mar        | 10:00            | 11                                   | 39       | 3         | 45      | 1            | 1     | 10             | 1.0     | 0.0        | 96              | 82.50611 | 6.9813    |                       |
| 30-Mar        | 10:20            | 7                                    | 31       | 2         | 45      | 15           | 0     | 9              | 0.3     | 0.3        | 71              | 82.50614 | 11.19458  |                       |
| 30-Mar        | 10:40            | 8                                    | 33       | 3         | 51      | 5            | 1     | 13             | 1.7     | 0.0        | 169             | 82.50461 | 16.70325  |                       |
| 30-Mar        | 11:20            | 2                                    | 3        | 3         | 80      | 8            | 5     | 16             | 1.6     | 1.0        | 3986            | 82.73554 | 16.05952  |                       |
| 31-Mar        | 14:20            | 5                                    | 39       | 2         | 45      | 10           | 0     | 36             | 2.4     | 1.0        | 74              | 84.04489 | -12.0732  |                       |
| 31-Mar        | 14:40            | 5                                    | 58       | 0         | 29      | 7            | 0     | 34             | 5.2     | 2.1        | 174             | 83.57378 | -14.6603  |                       |
| 31-Mar        | 15:00            | 5                                    | 33       | 3         | 43      | 16           | 0     | 33             | 2.5     | 0.3        | 73              | 83.08185 | -16.9647  |                       |
| 2-Apr         | 10:20            | 2                                    | 1        | 4         | 69      | 4            | 19    | 5              | 0.3     | 0.0        | 2883            | 81.37321 | -11.7275  |                       |
| 2-Apr         | 10:40            | 1                                    | 2        | 37        | 53      | 4            | 2     | 14             | 0.7     | 0.7        | 4930            | 81.07854 | -6.82414  | BB                    |
| 2-Apr         | 11:00            | 1                                    | 1        | 1         | 45      | 30           | 21    | 8              | 0.6     | 0.3        | 3459            | 80.64019 | -1.39979  |                       |
| 3-Apr         | 8:00             | 1                                    | 6        | 4         | 77      | 8            | 4     | 7              | 0.6     | 0.0        | 3475            | 81.37747 | -11.6657  |                       |
| 3-Apr         | 8:30             | 2                                    | 6        | 12        | 60      | 12           | 8     | 12             | 1.1     | 0.7        | 4279            | 80.98157 | -4.74884  | BB                    |
| 3-Apr         | 9:00             | 5                                    | 15       | 2         | 37      | 29           | 11    | 16             | 3.6     | 0.4        | 531             | 80.83391 | -5.49512  |                       |
| 3-Apr         | 11:00            | 4                                    | 15       | 2         | 58      | 5            | 16    | 22             | 3.2     | 0.7        | 286             | 80.91201 | -7.04061  |                       |
| 4-Apr         | 8:00             | 3                                    | 3        | 3         | 64      | 26           | 2     | 20             | 0.7     | 0.7        | 3291            | 81.37874 | -11.6985  |                       |
| 4-Apr         | 8:30             | 2                                    | 4        | 11        | 76      | 2            | 5     | 14             | 0.6     | 0.3        | 3966            | 81.07125 | -3.44506  | BB                    |
| 4-Apr         | 9:00             | 6                                    | 13       | 1         | 71      | 6            | 3     | 29             | 1.6     | 0.3        | 271             | 81.0339  | -2.40188  |                       |
| Average       |                  | 4                                    | 16       | 5         | 59      | 11           | 5     | 17             | 1.4     | 0.5        |                 |          |           |                       |
